# Supplementary material for: Quantitative Chemical Assay of Nanogram-Level PM Using Aerosol Mass Spectrometry: Characterization of Particles Collected from Uncrewed Atmospheric Measurement Platforms
Source: Copernicus journal article supplement (doi:10.5194/amt-2022-246), 2022-09-01
Supplement: Supplementary file [file amt-2022-246-AC3-supplement.pdf]

## Response to reviewer comments on “Quantitative Chemical Assay of Nanogram-Level PM Using Aerosol Mass Spectrometry: Characterization of Particles Collected from Uncrewed Atmospheric Measurement Platforms”

We thank the editor and the reviewers for their thoughtful and constructive comments and we have revised the manuscript accordingly. Listed below are our point-to-point responses (in blue) to the comments (repeated in black) and changes of the manuscript (in red).

### Response to Reviewer #3:

This paper describes a micro-nebulization plus HR-AMS technique to analyze very small aerosol samples collected with the type of collectors used on unmanned aerial systems (UAS). This is a welcome addition to the use of the HR-AMS for offline analysis and makes in situ sampling with UAS systems a real possibility. The paper is fairly well written and should be accepted for publication after the authors address the following points.

Line 16 and Table S3: This data does not justify 3 significant digits, especially in the detection limit. I would use at most 2.

Thank you for this suggestion. We have reduced the significant figures to 2.

Line 25: I’m not sure what you mean by “with temporal and spatial resolution.” The UAS sampling time in Table S1 is 15 hours over multiple days. I would delete this phrase.

This statement was meant to be taken as a more general comment, indicating that the opportunity for improving the temporal and spatial resolution for PM sampling can be improved with the MN-AMS technique. However, your comment makes it clear that this is not the message that is coming across. The text will be updated to the following to improve the clarity:

**This study demonstrates the utility of combining MN-AMS with uncrewed measurement platforms to provide quantitative measurements of ambient PM composition.**

Line 34-35 and throughout paper: Please format the citations properly, i.e., remove the extra parentheses and don’t include the author’s name if it is right before the citation.

We apologize for the incorrect citation formatting. The specific citations will be updated.

Lines 120-125: Since you include this data in the paper, please include the sampling dates and times in Table S1 and give the samples names. In Figure S7, you refer to SGP impactor 2, but it is not clear if you are referring to one sample or the average of multiple samples. Also, it is not clear if this is one stage (which size cut?) or multiple stages averaged together. Please specify in

the text that the four-stage impactor samples were collected at SGP. Delete “Note that” at the beginning of the last sentence.

The SIMS data presented in this manuscript was collected on 2021-11-16, 14:30-16:30. This overlaps with the end of sampling for the first impactor sample at SGP, not the second which is a typo in the caption for Fig. S7. This has now been corrected. The figure caption is referring to a single sample as we only had one sample (i.e. one filter or impactor) per sample listed in Table S1. The reference to a specific sample in the caption for Fig. S7 has been updated to “SGP\_I1” to clarify this.

SIMS data from one stage of the impactor is presented in this manuscript as a supporting measurement. This was the 4<sup>th</sup> stage with a size cutoff of 2.5  $\mu\text{m}$ . Text indicating the SIMS sample was collected at SGP has been added to section 2.2.

Line 128: Please use one system of units.

The “5/32-inch” has been updated to “3.97-mm” for consistency.

Lines 129-132: Why is the filter extraction/sonication performed in two steps?

The first sonication is performed with only methanol to aid in the extraction of lower polarity organic material specifically. The second sonication uses a methanol/water (in the form of an aqueous solution of ammonium sulfate) mixture to extract a wider (and more polar) range of material. There is prior work indicating that multiple extraction steps with different solvents can aid in the full extraction of PM adhered to filters (e.g. <sup>1</sup>). While we did not follow the methodology used in Bein and Wexler, 2015, this type of work was the impetus for performing two separate extraction steps. The limited number of samples (and total lack of replicate samples) precluded our ability to explore other extraction techniques.

Lines 144-148: In this description of the AMS, please mention that you were using N<sub>2</sub> as the carrier gas for the nebulization. This is important for interpreting the mass spectra in Figure 2b.

We agree with the reviewer that this is necessary information for the interpretation of the mass spectra in Figure 2b. The text has been updated to note the use of N<sub>2</sub> as the carrier gas for nebulization.

Figure 2: Please use more different colors in (a) and (b) for SO<sub>4</sub><sup>2-</sup> and <sup>34</sup>SO<sub>4</sub><sup>2-</sup>. e.g., red and black. It is hard to tell them apart.

Thank you for this suggestion as clarity of data presentation is extremely important. In this figure, <sup>34</sup>SO<sub>4</sub><sup>2-</sup> will be changed to black for increased contrast.

Lines 162-167: What was the point of the SIMS analysis? Is it preferential to N containing organics? Are there any references for applying this technique to ambient aerosol samples? I do not understand what the SIMS analysis adds to this paper.

The SIMS data is meant to support the MN-AMS data. Specifically, we believe we are detecting N-containing organics in the MN-AMS data, which has some precedence in the literature (as noted in lines 353-354). In order to bolster the conclusion that these are real species we are detecting and not an artifact, as well as demonstrating consistency between the MN-AMS measurement and an independent measurement, we included the SIMS data for comparison.

SIMS analysis has been used extensively for analysis of ambient PM samples, as a recent review demonstrates<sup>2</sup>. Text and this citation will be added to section 2.3.4 indicating the prior use of SIMS for PM analysis. To the best of our knowledge, the SIMS analysis that was performed is not preferential to N-containing organics. This was the focus for comparison to the MN-AMS data only to reinforce our conclusion of N-containing organics at the SGP site. A broader comparison of AMS and SIMS is not applicable due to the large differences in ionization mechanisms between the two instruments.

Lines 176-184: This description in the text is not consistent with the modified frag table provided in the SI. For example, text says  $CO=CO_2$ , but frag table has  $CO=0.75*CO_2$ . Why the nonstandard multiplier? Text says that S is removed from the parameterization, but it is still in the frag table as calculated from SO and SO<sub>2</sub>. Please correct either the frag table or the text! I would also rephrase the end of the sentence on lines 181-183 which seems confusing for non-AMS experts. Instead of “parameterized to the <sup>34</sup>SO<sub>2</sub> and <sup>34</sup>SO ions and the parameterizations for the S and <sup>34</sup>S were removed” maybe this works better: “parameterized to the <sup>34</sup>SO<sub>2</sub> and <sup>34</sup>SO ions. The signals for S and <sup>34</sup>S were determined directly from the high-resolution fits. Direct measurement of S is possible when N<sub>2</sub> is used as the carrier gas.”

We apologize for the lack of consistency regarding the frag table in the SI. Regarding the CO parameterization, the text is correct but the figure is out-of-date. We did originally use the  $CO=0.75*CO_2$  parameterization based on prior work performed in our lab (which was originally referenced in the text but later removed). However, once we obtained the ACSM data, the AMS data was reanalyzed using the parameterization mentioned in the text as it helped to align the AMS and ACSM analyses. The Table S2 is an unfortunate carry-over from the earlier analysis, and will be updated to reflect the frag table used for the data presented in the manuscript.

Regarding the S and j33S parameterizations, both the text and the figure in the SI are accurate. The text may be unclear, however. It is only referring to the “HR\_frag\_sulphate\_34” column in Table S2, not the frag table for ambient sulfate which was unchanged from the standard frag table parameterization for sulfate. The text will be updated to the following to clarify that the removal of S and j33S parameterizations refers only to the sulfate-34 data, and not to ambient sulfate:

This pattern was similar to the standard fragmentation pattern for sulfate except that the sulfate-associated H<sub>2</sub>O<sup>+</sup> signal was parameterized to the <sup>34</sup>SO<sub>2</sub><sup>+</sup> and <sup>34</sup>SO<sup>+</sup> ions and the parameterizations for the S and <sup>33</sup>S signals were removed from the <sup>34</sup>SO<sub>4</sub> fragmentation wave.

Line 193: Should that be [34SO<sub>4</sub>] instead of [X] in the numerator?

You are correct. We apologize for this error and the line has been updated as you indicate.

Lines 198-206: You describe the IC analysis of  $^{34}\text{SO}_4$  spiked samples, but you do not show any data for either the known laboratory solutions or the ambient samples. Please include a comparison of the IC and AMS  $\text{SO}_4$  for at least some samples. This could be a table in the SI and should be referred to in lines 225-226 where you mention additional validation with IC analysis.

IC analysis was performed mainly for preliminary validation for the use of  $^{34}\text{SO}_4$  for quantifying  $\text{SO}_4$  and for a more general assessment of any differences in behavior of  $^{34}\text{SO}_4$  and  $\text{SO}_4$ , some of which is shown in Figure 2. A figure in the SI displaying the calculated  $\text{SO}_4$  liquid concentrations determined for a series of standard solutions using both IC and MN-AMS will be included in the supplemental and descriptive text added to section 3.1.3 where the current Figure 2 is discussed.

Line 211 and elsewhere in the paper and SI: It's a "collison-type" atomizer, not "collision-type"

Thank you for pointing out this error. This is a rather interesting typo on our part. The use of the term "collision-type" was based on the term being used on the TSI webpage for the TSI 3076 atomizer which was used in this study (see Figure S1) as well as a number of prior studies (not directly relevant to this manuscript) using the term "collision-type". However, this may be a common typo across a number of sources and indeed the correct term does indeed appear to be "Collison-type". The text will be updated to fix this error.

Line 212 and line 216: I would remove editorializing comments like "sorely" and "apparently."

Thank you for the suggestion. This editorializing has been removed.

Line 222: What temperature is the spray chamber? Is it warm enough to evaporate  $\text{NH}_4\text{NO}_3$  and lead to the lower reported recovery for  $\text{NO}_3$  in Table S3?

The spray chamber was  $\sim 50^\circ\text{C}$ . Based on prior work performed in our lab with a thermodenuder, this temperature would be sufficient to evaporate a significant proportion of ammonium nitrate in the aerosol<sup>3</sup>. While we have not explored temperature modification as a way to improve the  $\text{NO}_3$  recovery, we believe the spray chamber temperature is a significant factor in the low  $\text{NO}_3$  recovery.

Lines 243 to 247 and Figure 3: Why does the data roll over at higher mass loading? I would add a sentence describing how you calculate NE. It's also not clear how you get a single value for NE from curved data. Is it the slope? Average of the ratios, in which case you should include the standard deviation? Refer to Table S3 when you mention the NE values. I would reorganize the caption to Figure 3. By the time you get to referring to the ratio between the two values, it is not clear if you are referring to (a) or (b). And there's a typo – "as in Fig. 1b" should be "as in Fig. 3b."

It is not fully clear why the data rolls over at higher mass loadings. The highest mass loading data corresponds both to the most concentrated samples and also data collected using the highest syringe pump flow rate. We currently believe we are "maxing out" the nebulizer through a

combination of relatively high solute concentration (the rollover data points have  $\sim 10 \text{ mg L}^{-1}$  total solute concentration) and higher liquid flow rate. It is possible that higher solute concentrations are leading to larger particles which are more likely to impact on the walls of the spray chamber.

For the NE, the range given in the main text and the values in Table S3 are based on the “best case scenario” of high solute concentration. However, if we instead use the average of the ratios (which may better reflect variability that would be seen in ambient samples) the NE changes only slightly ( $\sim 1.44 \% \pm 0.36$ ).

Regarding the figure caption, we thank you for the typo correction and the suggestion for reorganizing the caption. Both comments have been taken into account in the corrected caption for Figure 3.

Lines 281-282: Figures 2a and 2b are reversed.

Thank you for the correction, the typo has been fixed.

Line 286: I would add “on the ground” to the heading to make it clear these were not UAS samples.

Thank you for the suggestion. The section heading has been amended as suggested.

Lines 294-5: Did you subtract total organic mass for the blanks or subtract the mass spectrum for the blanks? The latter might help resolve whether the methanol contaminants are the cause of the differences between the filter and impactor. It’s a bit confusing that you had more organic in the impactor blanks, but less methanol.

The total organic mass for the blanks was subtracted, not the mass spectrum. The text has been modified to make this point clearer. We agree that the latter could help to resolve the issue with methanol contaminants, but the samples presented in this section likely had relatively low PM mass (given the short sampling duration), and attempts to perform a mass spectrum subtraction lead to highly uncertain data. This type of subtraction was performed for the samples collected at the SGP site which appeared to have a higher mass loading.

The impactor sample had a higher percentage of organic material, but lower total PM mass. Additionally, there are several differences in PM sampling between the filters and impactors collected at PNNL (noted in section 2.2) that could lead to further discrepancy in the collected PM.

Lines 311-317: I’m very confused by the UAS sampling. Table S1 has dates between 11/15 and 11/18, but Figure 4 shows a flight track on 11/13 and Figure 5 shows additional grey bars on 11/9 and 11/11. Is Table S1 incorrect? I’m also confused about whether you have one UAS filter sample or multiple filter samples because sometimes you use singular and sometimes plural in the text. Did you really fly a single filter over 9 days? How did you prevent adsorption of gas-phase species when the UAS was not flying? In Figure 5, is the pie comparison for the filter

using the ACSM data for only the indicated grey bar or for all the grey bars averaged together? Please clarify in the caption.

Table S1 contains an unfortunate error in the sampling times for the SGP\_F1 sample. The sampling times effectively shown in Figure 5 are correct, and Table S1 has been corrected. Thank you for pointing out this confusing error. The flight track in Figure 4 does in fact correspond to an actual flight track used during sampling for the SGP\_F1 sample.

The SGP\_F1 filter sample was flown over 7 seven flight from 2021-11-08 to 2021-11-16 (not all days had flights, as reflected in Figure 5a). The filter was stored at -20 °C in between flights, but no further effort was made to prevent desorption of gas-phase species. This could be a further source of discrepancy between the MN-AMS and ACSM data not already discussed in the manuscript. While using the same filter in this manner is not an ideal situation, our purpose here was more of a proof-of-concept of the MN-AMS technique rather than an intensive comparison between the MN-AMS and ACSM data.

Thank you for pointing out the lack of clarity in the averaging of the ACSM “filter” data. It was indeed averaged over the indicated gray bars (i.e. when the UAS filter was being sampled). Section 3.3 has been modified to make this point clear:

**Figure 5a shows the time series of ACSM-measured NR-PM<sub>1</sub> species, along with the corresponding sampling periods for the impactors and UAS filter samples during which the ACSM data was averaged.**

Figure 4: I think you could move this figure to the SI. What is the blue blob around SGP? Is that UAS flight track or something else? And if it is UAS flight track, why is there a ring of much higher concentration around it? Is it a different altitude?

Thank you for the suggestion. We believe that Figure 4 provides useful context for the SGP samples, as the location is discussed in section 3.3 and is relevant to some interpretation of the data presented in both Figure 5 and Figures S5-7. For these reasons, Figure 4 was included in the main text. However, we will consider moving it to the SI given that the flight track is only relevant to a single flight for the SGP\_F1 sample and particle concentration data shown is not discussed.

The blue blob around the SPG site is displaying the flight track. This is admittedly not very clear given the tight, nearly overlapping passes performed over SGP. More details about the flight tracks can be found in <sup>4</sup>, as cited in section 2.2.

Figure 5: It would be easier to compare the pies if you start organics at the top. You could also size the pies by the mass loading. In the caption, delete one of the uses of “offline” in the first sentence.

Thank you for the suggestion about lining the organics on top. We agree this helps to improve the clarity and the figure has been modified as such. We looked at sizing the pie charts by PM loading, but given the amount of data already presented in Figure 5, we believe that adding

additional information would make the figure too busy. Also, this information, while helpful to see, would be redundant in Figure 5 as it is explicitly presented in Figure 6.

Line 353: Somewhere earlier you should mention that the Q-ACSM is a PM1 and a unit mass resolution instrument.

This is indeed an important detail to note. The fact that it is a PM1 instrument is mentioned at the first mention of the ACSM in lines 323-325. That is provides unit mass data, however, was not stated. This detail has been added to lines 323-325.

Line 381: “a small number of UAS-collected” suggests you analyzed multiple filters, but I think you only analyzed one. Please correct this.

You are correct that only one UAS-collected sample (SGP\_F1) was analyzed in this study. The text in question was meant to refer to the use of the same sampling equipment used aboard the UAS and for the ground samples. However, this is not clear as written. The text has been updated to the following:

As a proof-of-concept, a small number of PM samples were collected using UAS sampling instrumentation and one sample was collected aboard a UAS and were analyzed using the MN-AMS technique.

Figure S2 a) caption: The description of the change in size distribution is not correct and not consistent with the text in lines 236-8 where you say that decreasing the concentration below 1 mg/L causes the size distribution to become too small to be effectively transmitted to the AMS lens. Please correct the caption.

The lines of the figure caption in question were referring to the mode diameters in Figure S2a. This was not stated, though, leading to a discrepancy between the figure caption and lines 236-238 as you point out. The relevant line in the figure caption has been changed to the following to avoid this confusion:

...The particle size distribution shifts to lower diameters as the total solute concentration decreases...

Figure S3: This figure is very confusing. What is the data in between organics and SO<sub>4</sub>? It is not identified in the legend. Please identify the lines in the legend! It would help to scale the zeros to the same place on the left and right axes. I'm going to assume that the unidentified trace is AMS SO<sub>4</sub>, in which case it looks like the ratio of the AMS Org/SO<sub>4</sub> is 20:1, even though the solution concentrations are 5:1. That would suggest much lower NE for SO<sub>4</sub> than Org, which is not consistent with Figure 3a. I don't understand the caption to Figure S3 – how is this a range of solute concentrations? It looks like just one. Presumably, this data corresponds to a single point in Figure 3. Which one? There's a significant variation in the AMS Org signal (from 0 to 50 ug/m<sup>3</sup>) across this time series. Do you have an explanation? When analyzing ambient samples, do you integrate across the entire nebulization? Or do you use the region where the AMS signal is stable? For the left axis, how are you measuring the solution concentration and why does it decrease at the start of the nebulization? You also need to correct the description of this Figure in

the text (lines 258-261) which refers to comparing both AMS modes and not what is actually in Figure S3 (sample data for one point in Figure 3).

The data in between the organic and SO<sub>4</sub> solution concentrations is the HR-AMS-measured concentration of both SO<sub>4</sub> and <sup>34</sup>SO<sub>4</sub>. This is currently labeled in the figure legend. We believe the confusion is coming from both the similar colors used for SO<sub>4</sub> and <sup>34</sup>SO<sub>4</sub> and the fact that the data is fully overlapping on the x-axis and nearly overlapping on the y-axis (making the two datasets difficult to visualize). Lines are used as the markers for both, but the <sup>34</sup>SO<sub>4</sub> marker was a diagonal line in order to make it distinguishable from the SO<sub>4</sub> data. To be consistent with a previous comment and to improve the clarity, the <sup>34</sup>SO<sub>4</sub> has been changed to black and vertical lines, with different sizes used to make it more distinguishable from the SO<sub>4</sub> data.

Regarding the potential discrepancy with NE values with organics and SO<sub>4</sub>, the confusion is the result of an unfortunate error on our part. The data presented in Fig. S3 is part of a much longer wave of data from experiments involving different ratios of organics, SO<sub>4</sub>, and <sup>34</sup>SO<sub>4</sub>. When examining a different segment of the data that had a different ratio of SO<sub>4</sub> to <sup>34</sup>SO<sub>4</sub>, an offset to the y-axis was applied (as a quick check to see the alignment of the HR-AMS measured mass concentration of SO<sub>4</sub> and <sup>34</sup>SO<sub>4</sub>). The offset was mistakenly left on, leading to a visually lower (and as you point out, much lower than it should be) NE compared to organics and what is presented in Figure 3. The offset was purely a visualization effect, which is why the <sup>34</sup>SO<sub>4</sub> normalized concentration also presented in Fig. S3 still gives the expected 5:1 ratio of organics-to-SO<sub>4</sub>. We apologize for this oversight. The figure was been corrected, and the actual ratio of organics-to-SO<sub>4</sub> is ~4.2, still lower than expected but reasonable considering the additional uncertainty associated with the open – closed calculation needed to determine the diff signal for Fast MS mode.

Regarding the figure caption, it is unfortunately confusing as written. The data in Figure S3 is from a single solution, however the figure caption was making a broader statement (discussed in the main text) about the AMS-signal stability while using the micronebulization system and Fast-MS mode sampling. The figure caption will be modified to the following to avoid this confusion:

**The HR-AMS-measured mass concentration of different component is highly reproducible using very low sample volumes (~53 μL) using the Fast-MS mode.**

The data presented in Figure S3 is in no way connected to the data in Figure 3. They were produced using solutions of different composition (with no overlap) and using different sampling modes on the AMS (Fast-MS for Figure S3 and Gen-Alt in Figure 3).

The variation at the beginning and end of the sampling period shown in Figure S3 is likely from the start and end of liquid flow into the nebulizer. In our preliminary work, we consistently noticed spikes in the AMS signal when the liquid flow was stopping (either from the syringe pump being turned off or the solution running out). The rise in signal is seen at the start of Figure S3 only shows the beginning of the liquid entering the nebulizer starting to form the particles measured by the AMS, which can be seen much more clearly when using Fast-MS mode and very short averaging times. However, in between these two states (liquid starting and stopping entering the nebulizer), the AMS-measured signal is very stable when using Fast-MS mode. This



is not stated in the main text as a more detailed analysis of the Fast-MS mode data was not a focus of our work at the time, and the key point for us was the stability and accuracy of the  $^{34}\text{SO}_4$ -normalized signal for both organics and  $\text{SO}_4$ .

For analysis of the ambient samples, only regions of AMS data with stable data were used. All ambient samples presented here were sampled using Gen-Alt mode with 1 min averaging. In this mode, given the small extraction volumes used for the ambient samples, we do see a similar rise and fall of the AMS signal when the solution is starting to enter the nebulizer and running out (although given the longer averaging time compared to the Fast-MS mode, the effect is not as dramatic). Only data points in between the rising and falling signal (i.e. where the signal was stable) were used.

The left axis is the  $^{34}\text{SO}_4$ -normalized signal, determined as described in section 2.4. For clarity, the axis label will be updated to " $^{34}\text{SO}_4$ -normalized solution concentration ( $\text{mg L}^{-1}$ )" to be more consistent with the nomenclature used elsewhere in the manuscript.

Thank you for pointing out the inconsistency in lines 258-261. These lines were meant to make the broader point that the AMS-measured signal is stable in both modes (which is true despite such data for the Gen-Alt mode not being explicitly presented in the same manner as the Fast-MS mode. The small standard deviations shown in Figure 3a support this claim.) The text will be updated to the following:

As shown in Figure S3, for MN-AMS setup reported here, the Fast-MS mode provides highly reproducible measurements of different chemical components in the liquid sample and the liquid concentration of organics and sulfate measured using the Fast-MS mode are accurate when normalized to the known concentration of  $^{34}\text{SO}_4$ .

Figure S4: Use the same units on the y-axis of (a) and the axes of (b). One is in percent and the other is fraction. Please include the mass loadings for the species as well as the fractional contribution in (c). Please note in the caption that this comparison is for samples PNNL\_F8 and PNNL\_I3. You have other pairs that are very similar in day/time, e.g., PNNL\_F7 and SGP\_I2. What does that comparison look like? You could also compare the sum of PNNL\_F1 through F6 with PNNL\_I1. What does that look like? I think this is worth a comment in the text.

Regarding the units of Figure S4 a,b, the units are the same. The axis labels on b will be updated to note that they are a percentage of the total organic signal.

More detailed, quantitative analysis was reserved for the SGP samples specifically as we had supporting, independent measurements that comparisons could be made to (e.g. ACSM, SIMS data). Including mass loadings in Figure S4 may serve to add confusion to the purpose of the data in Figure S4, which is meant to be a qualitative comparison between the filter and impactor sampling at PNNL showing how the differences in PM sampling and extraction techniques may lead to differences in measured organics and inorganics.

It is true that the PNNL\_F7 and PNNL\_I2 (not SGP\_I2) were sampled during similar time periods. Only data from PNNL\_F8 and PNNL\_I3 were shown in Figure S4 as the sampling

periods were purposefully fully overlapped, giving us the best look at the effects of sampling and extraction techniques on the observed chemistry. However, the comparison for the PNNL\_F7 and PNNL\_I2 samples were about as similar as the PNNL\_F8 and PNNL\_I3 samples. This comparison was excluded to avoid redundancy and unnecessarily lengthening the manuscript.

We did not attempt to sum PNNL\_F1 through F6 and compare that to PNNL\_I1, although such a comparison could be warranted given the closely overlapping sampling periods. Again, the most reasonable comparison is between PNNL\_F8 and PNNL\_I3, which were sampled for precisely the same time period and are a single filter being compared to a single impactor, rather than being sampled at (slightly) different time periods or being the sum of multiple filters compared to a single impactor. We did not feel that a more exhaustive analysis of the PNNL samples was warranted, given the greater abundance of independent measurements available at the SGP site.

Figure S5: It is odd that the Q-ACSM MS for Impactor 3 shows a lot more signal at higher  $m/z$ 's, but this is not reflected in the HR-AMS data. Or maybe this is an artifact of the  $m/z$  transmission efficiency calibration in the Q-ACSM data? Did something change in the way the Q-ACSM was operating?

We are unaware of any changes in the operation of the Q-ACSM during the entire sampling period, although we agree this discrepancy is odd. Unfortunately, due to the low PM loadings observed during the sampling period for SGP\_I3 (see Figure 5a), a number of factors may be at play here. The difference in ambient particle sizes sampled directly by the ACSM and collected onto the impactor may be a factor and more noticeable at very low PM mass loadings. Additionally, due to the low PM mass loading, the subtraction of the impactor blank is more significant for this impactor sample compared to the other SGP samples, leading to more uncertainty in the subtracted data.

Figure S6: It looks like the  $C_xH_yNO$  peak at  $m/z$  59 is mislabeled as  $CH_3NO_2$ . It is called  $C_2H_5NO$  in the text (line 357) and in Figure S7b. I am also concerned by the fit to  $m/z$  59 that you show in Figure S7b. Did you really not fit the  $C_3H_7O$  and  $C_2H_3O_2$  ions? You can't just arbitrarily leave out the organic ions because you want to see  $C_xH_yNO$ . Also,  $C_2H_7N_2$  is a very strange ion and not in the  $C_xH_yN$  series that you are observing. I suspect that is really  $C_3H_7O$ . Please fit  $m/z$  59 with the correct set of possible ions and then redo the MS in Figure S6 and Figure 5 (b-e).

Regarding the text reference in line 357, you are correct that this is a typo in the figure as  $C_2H_5NO$  is the correct label. It has been corrected in the figure.

Regarding the fitting of  $m/z$  59, there are two issues here. Both ions you suggest ( $C_3H_7O$  and  $C_2H_3O_2$ ) were in fact fit, but are not displayed in Figure S7b. They are not displayed for what was meant to be clarity as the signal intensity for both ions is extremely low (when  $C_2H_7N_2$  is also fit) and not obvious at the scale presented in Figure S7b. However, this does indeed imply we did not fit them so they will be added back to Figure S7b. We agree that one cannot arbitrarily include or exclude ions to obtain a wanted result. While the  $C_2H_7N_2$  ion is strange, it was included as the SIMS data suggested the presence of both  $C_3H_7O$  and  $C_2H_7N_2$ . Additionally, there are other  $C_xH_yN_2$  ions present (as suggested by the SIMS data), but at

notably lower AMS signal intensities making them not clear at the scales presented in Figure 5 or Figure S6.

Figure S7: Which AMS data are you using for the comparison with the SIMS data? Weren't they collected at different times? Does the SIMS preferentially detect C<sub>x</sub>H<sub>y</sub>N, but not C<sub>x</sub>H<sub>y</sub>NO? I don't understand how you have scaled the axes for the two signals. If your point is that the SIMS signal is comparable to the AMS CHN signal, then it seems like you should use the same relative scaling between right and left axes on all panels.

The AMS data used in Figure S7 is from SGP\_I1 (originally mislabeled as SGP\_I2). The SIMS sample shown here was collected on 2021-11-16 from 14:30 to 16:30 UTC. This has it overlapped almost entirely with SGP\_I1, although SGP\_I1 was sampled for a much longer period.

The scaling for the SIMS and AMS data has no purposeful connection as presented in Figure S7. Both datasets are presented as the raw signal intensities. We do not mean to imply any connection between signal intensities, rather we are trying to demonstrate that we can observe similar ions using these two independent measurements (with the focus being more on nitrogen-containing organics). Given the lack of similarities between on the SIMS and AMS signals are determined, we chose not to modify the scaling of either and present them simply as their raw signal intensities.

#### References:

- (1) Bein, K. J.; Wexler, A. S. Compositional Variance in Extracted Particulate Matter Using Different Filter Extraction Techniques. *Atmos. Environ.* **2015**, *107*, 24–34.
- (2) Huang, D.; Hua, X.; Xiu, G.-L.; Zheng, Y.-J.; Yu, X.-Y.; Long, Y.-T. Secondary Ion Mass Spectrometry: The Application in the Analysis of Atmospheric Particulate Matter. *Anal. Chim. Acta* **2017**, *989*, 1–14.
- (3) Yu, L.; Smith, J.; Laskin, A.; Anastasio, C.; Laskin, J.; Zhang, Q. Chemical Characterization of SOA Formed from Aqueous-Phase Reactions of Phenols with the Triplet Excited State of Carbonyl and Hydroxyl Radical. *Atmos. Chem. Phys.* **2014**, *14* (24), 13801–13816.
- (4) Mei, F.; Pekour, M.; Dexheimer, D.; de Boer, G.; Cook, R.; Tomlinson, J.; Schmid, B.; Goldberger, L.; Newsom, R.; Fast, J. Observational Data from Uncrewed Systems over Southern Great Plains. *Earth Syst. Sci. Data Discuss.* **2022**, *2022*, 1–25.
